# Supplementary material
Source: Springer Nature journal article supplement (https://www.springermedizin.de/resource/supplementary/12891_2013_1855_MOESM1_ESM.pdf/9508648)
Supplement: MOESM1 [file 9508648]

Adolescents with self-reported knee pain (n= 724)

Not included in the data analysis (n= 220)

- ◆ Not meeting inclusion criteria (n=54)
- ◆ Did not reveal telephone number (n=60)
- ◆ Did not answer the telephone (n=106)

Included in the data analysis (n=504)

**Sought medical care**

Traumatic onset (n=158)

◆ Sought medical care (n=111)

Insidious onset (n=346)

◆ Sought medical care (n=186)

**Currently under treatment**

Currently under treatment (n=41)

Exercises (n=25)

Foot or knee orthotics n=7)

Exercise and orthotics (n=1)

Surgery and post-operative exercises (n=8)

NSAID and advice on activity modification from their general practitioner (n=0)

Currently under treatment (n=47)

Exercises (n=25)

Foot or knee orthotics n=6)

Exercises and orthotics (n=9)

Surgery and post-operative exercises (n=4)

NSAID and advice on activity modification from their general practitioner (n=3)
